# Supplementary material
Source: publisher figshare collection journal article supplement (https://frontiersin.figshare.com/ndownloader/files/30896500)
Supplement: Supplementary file [file 30896500]

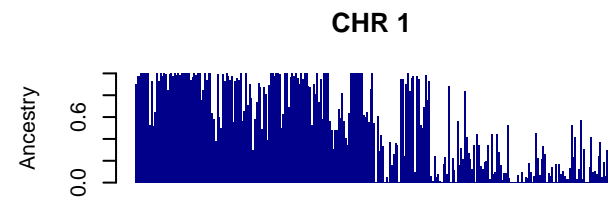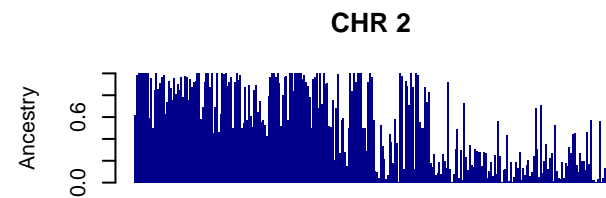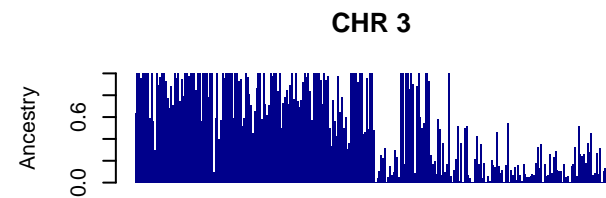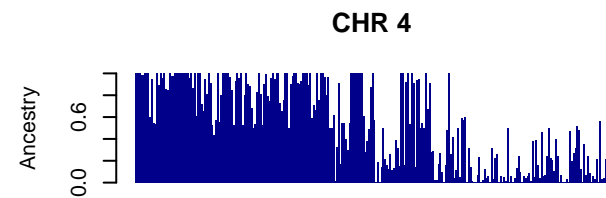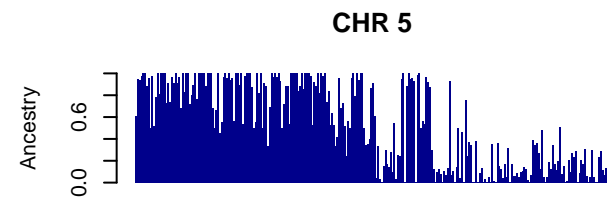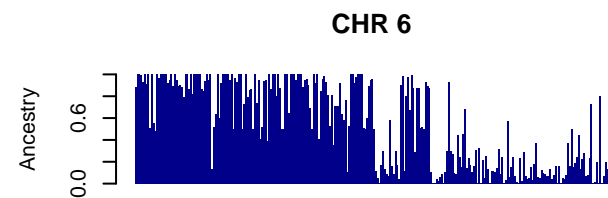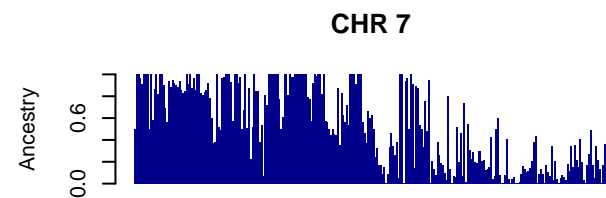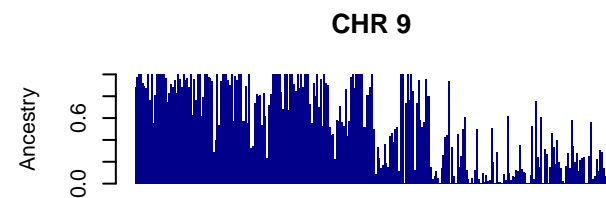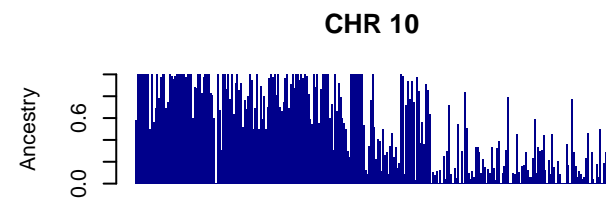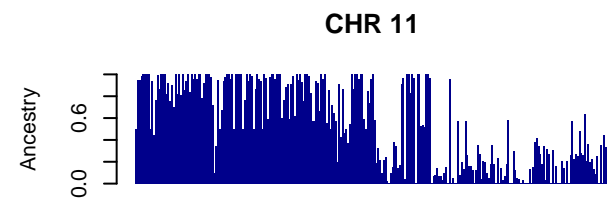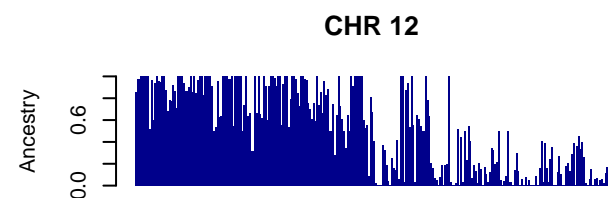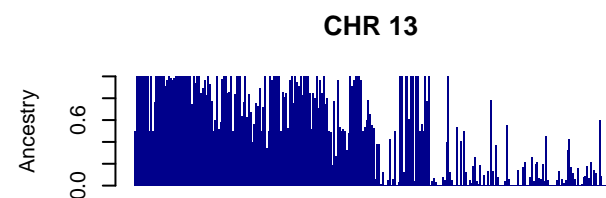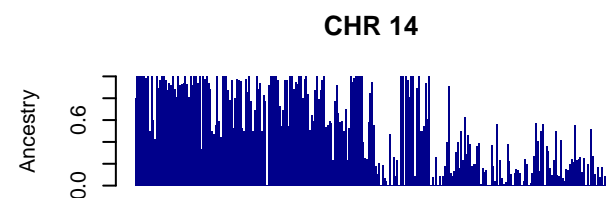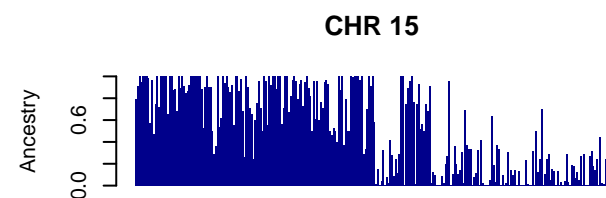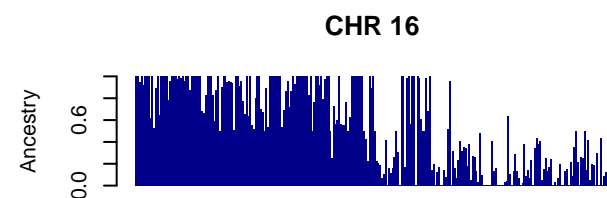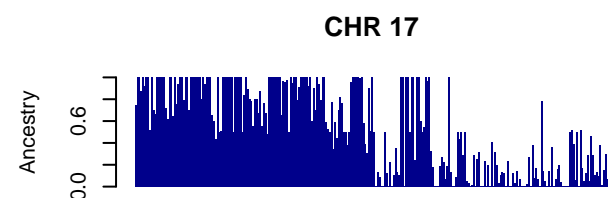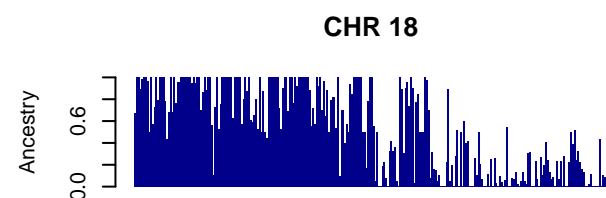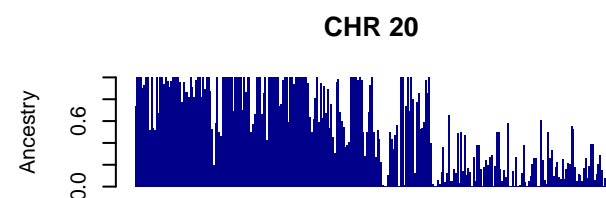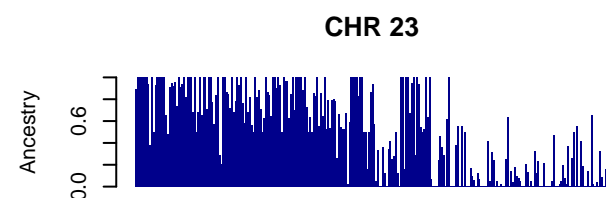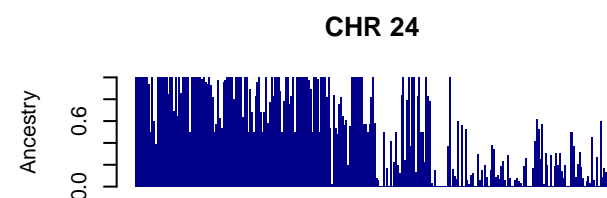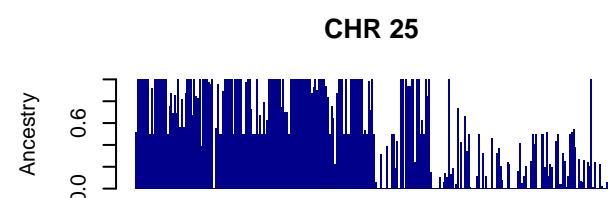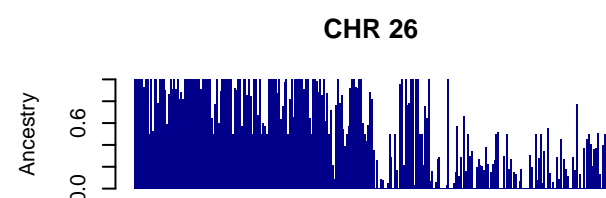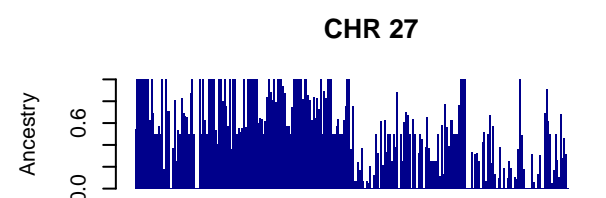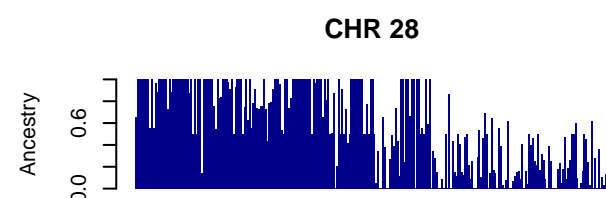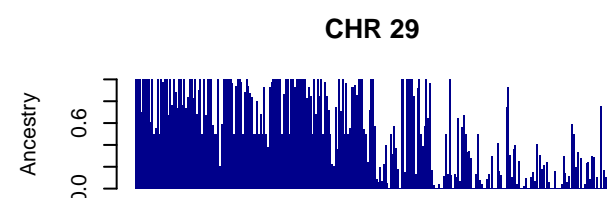

266 trypanosome negative crossbreds

266 trypanosome negative crossbreds

266 trypanosome negative crossbreds

266 trypanosome negative crossbreds

266 trypanosome negative crossbreds
